# Supplementary material for: QSRR Automator: A Tool for Automating Retention Time Prediction in Lipidomics and Metabolomics
Source: Metabolites. 2020 Jun 9;10(6):237. doi: 10.3390/metabo10060237 (PMC7345697; doi:10.3390/metabo10060237)
Supplement: Supplementary file 1 [file metabolites-10-00237-s001.zip › Supplementary Tables.xlsx]

## Sheet: Table S1
Data-Set Name	Peaks to predict	Compounds after filtering	Training Standards possibly observed	Training Standards after filtering
hilic_mlr2 standards	2151	601	102	85
QSRR Automater ave standards	2151	646	102	89
hilic_mlr2 brucei	2156	670	76	58
QSRR Automater ave brucei	2156	658	76	65

## Sheet: Table S2
Data-Set Name	Published vs QSRR Automater ave (p-value)	published vs measured (p-value)	QSRR Automater ave vs measured (p-value)
rp_met	0.857627	0.854873	0.964692
hilic_mlr1	0.166496	0.785238	0.45452
hilic_mlr2 standards	1.56682e-16	2.33278e-07	8.97697e-15
hilic_mlr2 brucei	7.43611e-30	0.00621163	2.86339e-05

## Sheet: Table S3
Compound	C18 Time (minutes)
Cer_NS d42:1	11.255
PEtOH 16:0_16:1	7.862
ACar 18:2	2.203
CE 20:4	13.845
LPC 20:4	2.019
LPE 20:4	2.103
ACar 18:3	1.792
PC 38:6	6.572
CE 18:2	14.164
TG 18:2_20:4_20:4	12.891
LPC 18:2	2.07
PC 18:2_18:2	6.717
LPE 18:2	2.133
PE 18:2_20:4	6.802
EtherPC 44:5e	10.209
ACar 16:1	1.977
TG 16:1_18:2_18:3	12.74
EtherPE 18:2e_20:4	9.655
EtherPE 18:2e_22:4	8.526
TG 18:1_18:2_18:2	13.713
HexCer_NS d22:1_20:2	9.231
EtherPC 16:1e_18:2	7.686
PE 17:1_22:4	7.47
LPC 0:0_20:3	2.386
SM d36:3	6.39
PC 18:1_22:6	7.038
PE 18:1_22:6	7.211
PE 18:1_20:4	7.474
PE 18:1_22:4	8.108
PI 18:1_20:4	6.488
PC 18:1_18:2	7.392
TG 52:4	13.681
TG 17:1_18:1_18:2	13.903
CE 18:1	14.56
ACar 18:1	2.841
TG 18:1_18:2_18:3	13.267
TG 18:1_18:1_18:2	14.162
LPC 18:1	2.709
PC 36:2	8.162
PS 38:5	6.606
LPE 18:1(d7)	2.766
PE 18:1_18:1	8.331
PC 40:5	8.071
ACar 20:1	3.798
TG 18:1_18:1_20:1	14.69
LPC 20:1	3.761
SM d42:3	8.858
TG 18:1_18:1_19:1	14.605
EtherPE 18:2e_18:1	8.828
TG 12:0_18:2_18:2	12.529
TG 12:0_18:1_18:2	13.034
Cer_AS d42:2	9.576
Cer_NS d18:1_24:2	10.023
Cer_NS d18:1_24:1	10.721
HexCer_NDS d42:2	9.933
SM d34:2	6.159
SM d36:2	7.046
SM d38:2	7.987
SM d40:2	8.725
SM d31:1	5.612
SM d32:1	6.023
SM d42:2	9.586
SM d44:2	10.403
Cer_AS d42:3	9.657
ACar 14:0	1.792
TG 12:0_14:0_18:1	12.921
LPC 14:0	1.682
PC 14:0_18:2	6.421
PE 14:0_20:4	6.508
EtherPE 16:1e_22:6	7.543
EtherPE 16:1e_20:4	7.805
EtherPE 16:1e_22:4	8.446
EtherPE 16:1e_18:1	8.66
Cer_ADS d42:2	10.492
SM d33:1	6.461
ACar 15:0	2.147
PE 15:0_20:4	6.982
PE 15:0_18:2	7.058
PG 15:0_18:1(d7)	6.862
PE 15:0_18:1(d7)	7.74
PS 15:0_18:1(d7)	6.739
TG 15:0_18:2_18:2	13.408
TG 15:0_16:1_18:2	13.331
LPC 15:0	2.027
PC 15:0_18:1(d7)	7.495
SM d32:0	6.342
SM d34:0	7.223
SM d44:1	11.252
Cer_NS d18:1_16:0	8.1
SM d34:1	6.793
TG 16:0_16:1_18:1	14.096
ACar 16:0	2.604
EtherPE 16:1e_16:0	8.585
PC 16:0_22:6	6.93
PE 16:0_22:6	7.118
PE 16:0_22:5	7.734
PE 16:0_20:4	7.392
PC 16:0_18:3	6.668
TG 16:0_18:2_18:3	13.232
PC 16:0_18:2	7.287
PI 16:0_18:2	6.436
PC 16:0_18:1	7.956
PS 34:1	7.164
PE 16:0_18:1	8.213
PI 38:3	7.489
TG 12:0_16:0_18:1	13.508
TG 15:0_16:0_16:1	13.789
EtherPC 16:0e_18:1	8.493
CE 16:0	14.566
TG 15:0_16:0_18:1	14.281
TG 14:0_14:0_16:0	13.487
TG 14:0_16:0_16:0	14.039
TG 16:0_16:1_18:2	13.609
TG 16:0_18:1_18:2	14.136
TG 14:0_16:0_18:2	13.562
TG 48:1(d7)	14.022
TG 14:0_16:0_18:1	14.057
PC 16:0_20:5	6.553
PC 16:0_20:4	7.146
PC 16:0_22:4	7.749
PC 16:0_20:3	7.511
PC 16:0_16:1	7.066
PC 16:0_16:0	7.859
PA 16:0_18:2	7.146
PA 16:0_18:1	8.479
PS 32:0	7.062
PE 16:0_22:4	8.019
PE 16:0_18:2	7.529
PE 16:0_16:0	8.123
LPC 16:0	2.481
EtherPE 18:1e_22:6	8.439
EtherPE 18:1e_20:4	8.704
EtherPE 18:1e_22:5	8.739
EtherPE 18:1e_22:4	9.317
EtherPE 18:1e_20:2	9.634
EtherPE 18:1e_20:1	10.341
EtherPE 18:1e_18:1	9.555
EtherPE 18:1e_22:1	11.095
EtherPE 18:1e_16:0	9.474
Cer_NS d33:1	7.633
Cer_NS d18:1_17:0	8.581
SM d35:1	7.376
PE 17:0_20:4	7.724
PC 17:0_18:2	7.638
PE 17:0_18:1	8.636
ACar 17:0	3.12
TG 17:0_18:1_18:2	14.339
TG 17:0_18:1_18:1	14.585
LPC 17:0	3.011
Cer_NS d18:1_18:0	9.04
Cer_NDS d36:0	9.349
SM d36:1	7.829
LPE 18:0	3.714
PC 18:0_22:6	7.786
PS 18:0_22:6	7.033
PC 18:0_20:4	8.036
PS 18:0_20:4	7.28
PI 18:0_20:4	7.123
PS 18:0_22:4	7.889
PE 18:0_22:4	8.895
PS 18:0_18:2	7.399
PI 18:0_18:2	7.263
PC 18:0_18:1	8.84
PS 18:0_18:1	8.065
PI 18:0_18:1	7.903
PE 18:0_18:1	9.095
TG 18:0_18:1_18:1	14.685
TG 16:0_18:0_18:1	14.682
PC 16:0_18:0	8.752
EtherPC 18:0e_16:0	9.286
ACar 18:0	3.676
TG 16:0_16:0_18:0	14.655
TG 49:0	14.572
TG 16:0_18:0_18:0	14.803
LPC 18:0	3.609
PC 18:0_20:3	8.391
PS 18:0_22:5	7.315
PS 16:0_18:0	7.954
TG 18:0_18:0_18:1	14.815
LPC 0:0_19:0	4.026
Cer_NS d18:2_20:0	9.163
Cer_NS d38:1	9.634
Cer_NDS d18:0_20:0	10.226
SM d38:1	8.75
TG 18:1_18:1_20:0	14.818
TG 18:1_18:1_22:0	14.918
TG 16:0_18:0_20:0	14.915
LPC 20:0	4.36
PC 44:1	11.951
Cer_NDS d39:0	10.657
Cer_ADS d41:0	10.849
Cer_NS d40:2	9.915
Cer_NS d40:1	10.471
Cer_NDS d40:0	11.052
HexCer_NS d40:1	9.963
SM d40:1	9.638
SM d40:0	9.949
TG 18:2_18:2_22:0	14.717
TG 60:2	15.008
TG 16:0_18:1_22:0	14.917
LPC 22:0	5.08
Cer_ADS d42:0	11.144
Cer_AP t42:1	9.702
HexCer_NDS d41:1	10.407
SM d41:1	9.93
Cer_ADS d42:1	11.202
Cer_AP t42:0	10.557
SM d42:1	10.462
SM d42:0	10.762
ACar 24:0	5.759
LPC 0:0_26:0	6.812
EtherPE 18:0e_20:4	8.843
EtherPE 18:0e_22:4	9.452

## Sheet: Table S4
Column	Split	Replicate	# of features used	model used	SVR C value	SVR gamma value	Slope	Intercept	R squared
C18	1	1	28	SVR	100	0.1	0.9811	0.1582	0.9951
	1	2	48	SVR	10	0.1	0.9849	0.1395	0.9963
	1	3	58	SVR	100	0.1	0.9808	0.2011	0.9954
	2	1	64	SVR	1000	0.01	1.0023	-0.0177	0.9982
	2	2	19	SVR	1000	0.1	0.9993	0.0108	0.9986
	2	3	34	SVR	10	0.1	0.9933	0.0464	0.9974
	3	1	38	SVR	10	0.1	0.9909	0.0667	0.9902
	3	2	63	SVR	1000	0.01	0.986	0.1762	0.9854
	3	3	53	SVR	1000	0.1	0.9852	0.1141	0.9884
	4	1	41	SVR	100	0.1	0.9927	0.0741	0.9951
	4	2	56	SVR	1000	0.01	0.9906	0.0984	0.9945
	4	3	101	SVR	1000	0.01	0.993	0.0698	0.9954
	5	1	38	SVR	10	0.1	0.9917	0.0533	0.997
	5	2	18	SVR	100	0.1	0.9952	0.0492	0.9981
	5	3	28	SVR	100	0.1	0.993	0.0552	0.998
average			45.8				0.990667	0.0863533	0.994873

## Sheet: Table S5
Features	number of models used in
VE2_A	15
AXp-0d	15
VE2_D	15
NssCH2	15
MAXsCH3	15
MINssCH2	15
IC0	15
CIC0	15
PEOE_VSA6	15
PEOE_VSA9	15
AMID	15
AMID_C	15
SLogP	15
EState_VSA1	14
EState_VSA5	14
VSA_EState8	14
MDEC-22	14
BCUTi-1h	14
SpMAD_A	13
ATSC1dv	13
C2SP3	13
VE2_DzZ	13
ATSC1s	12
ETA_dEpsilon_C	12
AATS7s	11
AATSC1dv	11
AATS1i	11
MAXssCH2	11
ETA_epsilon_5	11
PEOE_VSA1	11
MAXdO	10
ETA_dBeta	10
nBonds	9
SpAbs_DzZ	9
nAtom	9
CIC1	8
NdssC	8
Diameter	8
MID_N	7
ATSC2Z	7
GATS3c	7
AETA_eta	7
FilterItLogS	7
nRot	7
Vabc	7
GATS1Z	7
apol	7
VMcGowan	6
MDEC-23	6
AATSC0d	6
BCUTse-1l	6
GATS3dv	5
RotRatio	5
nN	5
GATS1s	5
SlogP_VSA1	5
GATS8c	4
MATS3c	4
MINsCH3	4
ECIndex	4
ETA_epsilon_1	4
AMID_h	4
VSA_EState7	4
ATS0d	3
ATSC5s	3
AETA_eta_L	3
JGI7	3
BCUTd-1l	2
GATS1dv	2
SsssCH	2
SpAbs_A	2
SpAbs_D	2
ETA_epsilon_3	2
fragCpx	2
LabuteASA	2
WPath	2
WPol	2
GATS8Z	2
AATS6d	1
ATS1dv	1
MINdO	1
JGI8	1
ATSC5d	1
ETA_alpha	1
VAdjMat	1
AATS0dv	1
AATS5i	1
ATSC8s	1
ATSC5Z	1
ATSC6v	1
ATSC8v	1
ATSC6se	1
ATSC4p	1
ATSC5p	1
ATSC6p	1
MATS2d	1
GATS7c	1
GATS5dv	1
GATS2d	1
GATS5d	1
GATS5Z	1
GATS5v	1
GATS7v	1
GATS5p	1
GATS8p	1
BCUTdv-1l	1
Xp-0d	1
Kier1	1
VSA_EState1	1
MID	1
JGI1	1
MWC01	1
SMR	1

## Sheet: Table S6
Compound	BEH Amide time (minutes)	CHILIC Time (minutes)	HILIC-Z Time (minutes)	iHILIC Time (minutes)	PHILIC Time (minutes)
(2R)-2,3-Dihydroxypropyl dihydrogen phosphate	6.3035	11.4507	9.02775	not observed or confidently identified	9.708
(2S)-2-Hydroxy-2-methylsuccinic acid	not observed or confidently identified	1.947	7.9645	not observed or confidently identified	not observed or confidently identified
(4R)-4-Hydroxy-L-glutamic acid	not observed or confidently identified	11.2977	9.25733	not observed or confidently identified	9.837
(hexanoylamino)acetic acid	2.58075	5.76433	3.3815	2.36725	2.203
(isobutyrylamino)acetic acid	3.3785	6.87167	2.891	2.7215	not observed or confidently identified
(propionylamino)acetic acid	5.108	10.0292	not observed or confidently identified	5.0365	8.8345
(R)-2,3-DIHYDROXYPROPANOIC ACID	5.0885	9.382	5.3915	4.395	not observed or confidently identified
(R)-Pantetheine	3.678	not observed or confidently identified	not observed or confidently identified	not observed or confidently identified	not observed or confidently identified
1,3-Diaminopropane	6.303	not observed or confidently identified	12.486	12.2465	12.9925
1-methyl-4-oxo-1,4-dihydropyridine-3-carboxamide	3.711	6.74533	5.37525	3.9215	6.2085
1-Methylhistamine	4.043	10.8987	6.351	5.438	9.2715
1-Methyl-L-histidine	6.835	14.101	8.10967	5.58	9.139
1-Methylnicotinamide	not observed or confidently identified	not observed or confidently identified	not observed or confidently identified	5.1535	not observed or confidently identified
2-(hydroxymethyl)butanoic acid	2.2305	5.08267	not observed or confidently identified	2.22375	not observed or confidently identified
2-(PHOSPHONOOXY)ACETIC ACID	not observed or confidently identified	12.385	9.556	not observed or confidently identified	not observed or confidently identified
2,3-Diphospho-D-glyceric acid	not observed or confidently identified	13.6887	not observed or confidently identified	not observed or confidently identified	not observed or confidently identified
2,3-Pyridinedicarboxylic acid	not observed or confidently identified	not observed or confidently identified	not observed or confidently identified	6.3705	9.7905
2,5-Dihydroxybenzaldehyde	1.7835	7.60333	2.931	2.532	not observed or confidently identified
2,5-Dihydroxybenzoic acid	1.7655	6.25983	1.8345	2.2155	4.635
2-Amino-3-methoxybenzoic acid	1.3855	2.92283	2.765	1.91925	not observed or confidently identified
2-Aminoadipic acid	6.02075	11.2145	8.645	5.5895	9.66
2-Deoxy-5-cytidylic acid	6.2615	11.1663	9.1725	6.08725	9.6485
2-Deoxyadenosine	2.282	4.04833	3.14075	2.924	4.4375
2-Deoxyadenosine 5-(tetrahydrogen triphosphate)	not observed or confidently identified	12.1607	not observed or confidently identified	not observed or confidently identified	10.3215
2-Deoxycytidine	3.179	6.539	4.65725	3.6145	6.171
2-Deoxycytidine 5-diphosphate	7.534	12.1042	10.2282	9.109	10.3818
2-Deoxy-D-ribonic acid	4.8895	9.78133	5.8755	not observed or confidently identified	8.1565
2-Deoxy-D-ribose	not observed or confidently identified	7.99933	not observed or confidently identified	not observed or confidently identified	not observed or confidently identified
2-Deoxyguanosine	3.5125	7.03133	5.014	3.90925	6.69275
2-Deoxyguanosine 5-diphosphate	not observed or confidently identified	12.3433	10.022	not observed or confidently identified	10.8453
2-DEOXYGUANOSINE 5-TRIPHOSPHATE	not observed or confidently identified	not observed or confidently identified	not observed or confidently identified	not observed or confidently identified	11.534
2-Deoxyinosine	2.78125	6.04033	4.10967	3.30325	5.68725
2-Deoxyribose-5-phosphate	not observed or confidently identified	11.178	8.7935	not observed or confidently identified	9.5085
2-Deoxyuridine	not observed or confidently identified	4.45233	2.92267	2.533	4.40575
2-Deoxyuridine 5-monophosphate	5.7795	10.2667	8.27825	5.4535	9.095
2-Hydroxyisocaproic acid	2.2485	5.14933	1.769	2.143	2.43
2-Hydroxyphenylacetic acid	not observed or confidently identified	4.63367	1.799	1.8735	not observed or confidently identified
2-Methylglutaric acid	4.3755	not observed or confidently identified	7.854	2.941	9.174
3,3-Dimethylacrylic acid	5.0225	9.881	not observed or confidently identified	not observed or confidently identified	not observed or confidently identified
3,5-Diiodo-L-tyrosine	3.97775	6.81867	5.972	4.53275	8.62025
3-Aminoisobutyric acid	not observed or confidently identified	9.542	not observed or confidently identified	4.926	not observed or confidently identified
3-Aminopiperidin-2-one	not observed or confidently identified	8.56767	5.7675	5.114	not observed or confidently identified
3-Furoic acid	1.998	not observed or confidently identified	not observed or confidently identified	4.45	not observed or confidently identified
3-Hydroxy-3-methylglutaric acid	5.0225	9.881	7.4015	not observed or confidently identified	9.2395
3-Hydroxybutyric acid	3.381	7.00467	not observed or confidently identified	2.515	5.383
3-Hydroxybutyryl-CoA	6.271	11.1763	9.0335	not observed or confidently identified	8.551
3-Hydroxy-DL-kynurenine	not observed or confidently identified	not observed or confidently identified	not observed or confidently identified	3.4145	not observed or confidently identified
3-Iodo-L-tyrosine	4.07675	7.9525	5.873	4.57925	7.12767
3-Methoxytyramine	2.979	6.89833	5.2685	4.67	8.4535
3-methyl-2-oxobutyrate	not observed or confidently identified	not observed or confidently identified	not observed or confidently identified	1.958	not observed or confidently identified
3'-Phosphoadenylyl sulfate	not observed or confidently identified	12.7507	9.0125	7.378	12.3265
3-Sulfopyruvic acid	not observed or confidently identified	11.005	not observed or confidently identified	not observed or confidently identified	11.608
3-Ureidopropionic acid	4.475	not observed or confidently identified	not observed or confidently identified	not observed or confidently identified	7.7045
4,6-Dioxoheptanoic acid	2.514	not observed or confidently identified	4.7695	not observed or confidently identified	not observed or confidently identified
4-Aminobutanoate	not observed or confidently identified	10.593	not observed or confidently identified	4.166	not observed or confidently identified
4-Guanidinobutyric acid	4.90725	10.099	8.1685	5.28675	8.8425
4-Hydroxybenzoic acid	1.7835	not observed or confidently identified	3.425	2.532	not observed or confidently identified
4-Hydroxyphenylacetylglycine	3.5775	7.82933	3.5345	3.305	6.231
4-Hydroxyphenylpyruvic acid	not observed or confidently identified	not observed or confidently identified	not observed or confidently identified	1.632	not observed or confidently identified
4-Imidazoleacetic acid	5.14	10.1688	7.358	5.07	7.3605
4-Imidazoleacrylic acid	3.761	8.11533	3.37025	3.4365	6.9425
4-phenylbutanoic acid	1.2335	2.46867	not observed or confidently identified	1.7465	2.111
4-Pyridoxic acid	1.54225	3.89733	2.13025	1.8	1.9195
5-Amino-1-(5-O-phosphono-B-D-ribofuranosyl)-1H-imidazole-4-carboxamide	6.245	11.2212	8.9625	not observed or confidently identified	9.8005
5-Hydroxy-L-tryptophan	1.916	8.98483	not observed or confidently identified	4.9325	not observed or confidently identified
5-Methoxy-3-indoleacetic acid	1.45075	3.81733	3.62975	1.9585	4.8915
5-Methoxytryptamine	2.547	5.761	4.7595	4.4055	8.693
5-Methyltetrahydrofolic acid	3.079	not observed or confidently identified	4.7295	not observed or confidently identified	not observed or confidently identified
5-Methyluridine	2.24875	5.00283	3.05575	2.8415	4.77175
6-(Dimethylamino)purine	1.584	2.78633	2.34525	2.234	2.679
6-DEOXY-L-GALACTONIC ACID	5.5875	9.502	5.6655	4.7595	not observed or confidently identified
6-Phosphogluconic acid	not observed or confidently identified	12.7907	9.7555	9.792	11.1895
Acetyl coenzyme A	not observed or confidently identified	not observed or confidently identified	not observed or confidently identified	not observed or confidently identified	7.862
ACETYLAMINO-ACETIC ACID	4.30075	8.60733	5.98075	3.59075	not observed or confidently identified
Adenine	2.449	4.79017	3.35467	3.3115	5.21625
Adenosine	2.714	5.30533	3.52475	3.25675	5.238
Adenosine 3,5-diphosphate	6.6365	12.3183	10.3102	7.7645	not observed or confidently identified
Adenosine diphosphate	not observed or confidently identified	11.6885	10.022	not observed or confidently identified	10.0422
Adenosine monophosphate	6.23725	10.711	8.58925	5.02075	9.106
Adenosine triphosphate	not observed or confidently identified	not observed or confidently identified	not observed or confidently identified	not observed or confidently identified	10.741
ADENYLOSUCCINIC ACID	not observed or confidently identified	13.017	10.7687	not observed or confidently identified	11.374
a-D-Glucose 1-phosphate	6.7435	12.1192	9.45025	7.44125	10.3417
Agmatine	5.8375	not observed or confidently identified	11.4435	12.6605	17.068
Anserine	5.805	11.8597	9.30725	6.1905	8.534
Anthranilate	1.41775	3.25533	2.81875	2.02475	3.9195
Benzoate	not observed or confidently identified	not observed or confidently identified	not observed or confidently identified	1.794	not observed or confidently identified
beta-Alanine	not observed or confidently identified	9.808	not observed or confidently identified	not observed or confidently identified	not observed or confidently identified
Betaine	3.976	7.88933	5.842	3.782	6.4135
beta-Nicotinamide mononucleotide	7.8325	11.986	9.678	7.341	9.7525
Biocytin	5.00725	8.41467	7.63625	5.10075	7.47667
Biotin	3.17925	5.43683	not observed or confidently identified	2.7755	6.17825
B-L-Fucose 1-phosphate	6.7175	11.76	9.0825	6.2105	9.9425
B-NADH	4.3755	10.7723	8.268	not observed or confidently identified	not observed or confidently identified
B-NADPH	6.869	12.3982	not observed or confidently identified	7.7425	10.7485
Butyryl coenzyme A	not observed or confidently identified	10.4733	9.05	not observed or confidently identified	7.9575
Cadaverine	5.904	not observed or confidently identified	11.593	11.4435	not observed or confidently identified
Carnitine	4.907	9.70167	7.533	4.65	7.7605
CDPcholine	6.16175	11.3627	9.47725	5.86	9.7185
CDP-ethanolamine	6.2535	11.7118	9.427	6.056	10.3063
CDP-GLYCEROL	6.23675	11.7135	8.898	5.789	10.2597
Choline	3.378	8.13533	5.5975	4.4305	9.2865
Choline glycerophosphate	5.173	10.104	8.222	5.061	8.545
Cinnabarinic Acid	1.0855	not observed or confidently identified	not observed or confidently identified	1.594	not observed or confidently identified
cis-Aconitic acid	5.3545	not observed or confidently identified	8.7035	4.455	10.985
Citric acid	not observed or confidently identified	not observed or confidently identified	10.6035	9.428	not observed or confidently identified
Creatine	4.8735	9.62167	not observed or confidently identified	5.059	8.6185
Crotonoyl coenzyme A	5.838	10.593	7.8995	not observed or confidently identified	7.93475
Cyclic AMP	4.37575	8.265	5.76075	4.138	6.45233
Cyclic GMP	4.84075	9.5735	6.57625	4.70425	8.38467
Cysteamine	6.0035	12.7607	not observed or confidently identified	7.6775	9.7655
Cytidine	3.62775	7.31067	5.059	3.9575	7.07125
Cytidine 5-diphosphate	7.6005	12.385	10.3605	9.488	10.8682
Cytidine 5-triphosphate	not observed or confidently identified	13.0203	not observed or confidently identified	11.947	11.474
Cytidine monophosphate	6.4365	11.5653	9.48175	6.4325	10.21
Cytidine-5'-monophospho-N-acetylneuraminic acid sodium salt	6.30425	11.5453	8.755	5.8245	9.93475
D-(-)-Fructose	3.978	not observed or confidently identified	not observed or confidently identified	5.4505	7.739
D-(+) Glucose	4.378	not observed or confidently identified	6.2185	5.2715	8.3215
D-(+)-Glucosamine	5.4055	11.5903	not observed or confidently identified	6.565	8.5025
D-(+)-Maltose	5.4415	not observed or confidently identified	7.845	5.2665	9.75775
D-(+)-Trehalose	6.1525	11.9127	8.1945	6.0075	not observed or confidently identified
D-Arabinonic acid	not observed or confidently identified	10.2037	not observed or confidently identified	not observed or confidently identified	8.775
Decanoic acid	1.134	not observed or confidently identified	1.8745	1.632	not observed or confidently identified
Deoxyadenosine diphosphate (dADP)	not observed or confidently identified	11.4143	not observed or confidently identified	10.2495	9.59325
Deoxyadenosine monophosphate	5.89575	10.1673	8.47725	5.5275	8.581
Deoxycytidine triphosphate	not observed or confidently identified	12.8007	9.671	11.927	11.13
Deoxyguanylate	6.41125	11.3743	9.2655	7.451	9.97525
Dephosphocoenzyme A	6.371	11.7202	not observed or confidently identified	6.0225	not observed or confidently identified
D-Fructose 1,6-bisphosphate	not observed or confidently identified	14.0943	not observed or confidently identified	not observed or confidently identified	not observed or confidently identified
D-Fructose 6-phosphate	6.7435	12.1192	9.45025	7.44125	10.2715
D-Gluconic acid	6.3695	10.433	not observed or confidently identified	5.819	9.104
D-Glucosamine 6-phosphate	not observed or confidently identified	14.051	9.8655	not observed or confidently identified	10.566
D-Glucose 6-phosphate	6.7435	12.1192	9.45025	7.44125	10.2715
D-Glucuronic acid	5.7385	10.9853	6.8615	5.2105	10.082
D-Glucurono-6,3-lactone	not observed or confidently identified	not observed or confidently identified	not observed or confidently identified	not observed or confidently identified	9.952
D-Glyceraldehyde 3-phosphate	not observed or confidently identified	11.5103	8.848	5.9215	9.9025
Diadenosine triphosphate	6.50275	11.6418	8.9555	6.031	9.791
Dihydrouracil	not observed or confidently identified	not observed or confidently identified	not observed or confidently identified	3.9665	not observed or confidently identified
DL-3,4-Dihydroxymandelic acid	not observed or confidently identified	9.871	not observed or confidently identified	not observed or confidently identified	not observed or confidently identified
DL-3-Ureidoisobutyric acid	not observed or confidently identified	8.39133	not observed or confidently identified	not observed or confidently identified	not observed or confidently identified
DL-4-Hydroxy-3-methoxymandelic acid	3.2455	7.59667	2.926	2.7565	5.992
D-Lactaldehyde	not observed or confidently identified	not observed or confidently identified	not observed or confidently identified	3.1205	not observed or confidently identified
D-Lactose	5.4415	9.97733	7.845	5.2665	9.75775
DL-Homocystine	not observed or confidently identified	11.366	9.198	not observed or confidently identified	10.1085
DL-Isocitric acid	not observed or confidently identified	12.9637	9.8305	9.428	not observed or confidently identified
DL-Mandelic acid	2.2305	5.88733	2.129	2.2705	2.949
D-myo-Inositol-1,4,6-triphosphate	not observed or confidently identified	not observed or confidently identified	10.7085	not observed or confidently identified	not observed or confidently identified
dodecanedioic acid	1.5665	not observed or confidently identified	4.15775	1.8215	5.6605
D-Ornithine	6.4695	14.3073	not observed or confidently identified	7.884	11.698
D-Raffinose	5.973	11.0847	8.937	5.845	not observed or confidently identified
D-Ribose	2.716	6.70867	not observed or confidently identified	2.2855	not observed or confidently identified
D-Ribose 1-phosphate	not observed or confidently identified	11.562	8.8775	7.368	9.8075
D-Ribose 5-phosphate	not observed or confidently identified	11.562	8.8775	7.368	10.172
D-Saccharic acid	not observed or confidently identified	11.81	8.394	8.8495	11.1595
D-Sedoheptulose 7-phosphate	not observed or confidently identified	12.1857	9.262	not observed or confidently identified	10.4115
Dulcitol	4.3935	8.90683	6.17075	4.3675	8.152
dUTP	not observed or confidently identified	12.3118	9.1075	11.084	10.6988
D-XYLULOSE-5-PHOSPHATE	not observed or confidently identified	11.562	8.8775	7.368	10.172
Epinephrine	not observed or confidently identified	7.76933	not observed or confidently identified	3.1385	not observed or confidently identified
Erythrono-1,4-lactone	not observed or confidently identified	not observed or confidently identified	3.104	3.315	not observed or confidently identified
Flavin adenine dinucleotide	5.806	10.0225	7.305	5.428	7.92975
Folic acid	5.96275	11.2412	9.4725	5.728	10.529
Folinic acid	5.89575	11.025	9.066	5.6445	9.783
Galactinol	not observed or confidently identified	11.9127	not observed or confidently identified	not observed or confidently identified	not observed or confidently identified
Galactosylglycerol	4.577	9.00967	6.396	4.44575	not observed or confidently identified
Glucono delta-lactone	not observed or confidently identified	not observed or confidently identified	7.183	not observed or confidently identified	not observed or confidently identified
Glutaric acid	5.1065	not observed or confidently identified	not observed or confidently identified	3.684	8.486
Glutathione	3.911	not observed or confidently identified	not observed or confidently identified	5.2655	not observed or confidently identified
Glutathione disulfide	not observed or confidently identified	12.7375	10.1795	7.34925	11.0927
Glycerone phosphate	not observed or confidently identified	11.5103	8.817	not observed or confidently identified	not observed or confidently identified
Glycine	3.148	not observed or confidently identified	not observed or confidently identified	3.3805	not observed or confidently identified
Glycochenodeoxycholate	1.1265	not observed or confidently identified	1.9355	1.578	1.5035
Glycocholate	1.1005	not observed or confidently identified	2.01525	1.577	not observed or confidently identified
Glycolic acid	4.442	8.93333	7.1855	3.744	not observed or confidently identified
Guanidineacetic acid	4.974	10.0475	7.86425	5.27925	9.227
Guanine	3.49575	7.0595	4.86133	3.919	6.61
Guanosine	3.91075	7.85767	5.58125	4.25525	7.57333
Guanosine 5-diphosphate	not observed or confidently identified	12.7358	not observed or confidently identified	11.229	11.312
Guanosine 5-monophosphate	6.836	11.8663	9.41	7.71025	10.6483
Guanosine 5-triphosphate	not observed or confidently identified	13.3112	9.8155	not observed or confidently identified	11.9375
Guanosine diphosphate mannose	6.70325	12.4317	9.14433	6.2685	11.3915
Hippuric acid	2.9465	6.30967	3.81425	2.7505	3.09825
Histamine	4.475	11.8167	7.3235	6.3855	10.3685
Homovanillic acid	not observed or confidently identified	not observed or confidently identified	not observed or confidently identified	1.921	not observed or confidently identified
Hypotaurine	4.7745	9.92433	7.762	5.11225	8.969
Hypoxanthine	2.78	6.04367	not observed or confidently identified	3.305	5.6025
Indole-3-acetic acid	1.452	3.90233	3.861	1.99725	5.398
Indole-3-pyruvic acid	not observed or confidently identified	not observed or confidently identified	not observed or confidently identified	2.859	not observed or confidently identified
Inosine	3.3125	6.898	4.60975	3.66075	6.6575
Inosine 5-diphosphate	not observed or confidently identified	12.144	not observed or confidently identified	7.418	10.7255
Inosine 5-monophosphate	not observed or confidently identified	11.2095	9.03133	7.371	10.0975
Inosine 5-triphosphate	not observed or confidently identified	12.8457	not observed or confidently identified	not observed or confidently identified	11.529
Isovaleric acid	4.3755	9.89767	not observed or confidently identified	not observed or confidently identified	not observed or confidently identified
ISOVALERYL COENZYME A	6.93575	10.24	8.02333	8.2635	7.43825
L-(-)-Fucose	3.2125	7.51367	not observed or confidently identified	4.612	not observed or confidently identified
L-(-)-Malic acid	8.811	11.4937	8.853	not observed or confidently identified	10.2815
L-(+)-Lactic acid	not observed or confidently identified	7.97567	not observed or confidently identified	not observed or confidently identified	not observed or confidently identified
L-2-Aminobutyric acid	not observed or confidently identified	9.14633	6.975	4.926	not observed or confidently identified
L-a-Aspartyl-L-phenylalanine	5.32275	9.57183	7.31475	4.96575	7.88567
L-a-Hydroxyglutaric acid	not observed or confidently identified	11.1413	8.005	not observed or confidently identified	9.613
L-Alanine	4.973	9.68167	7.483	5.064	8.6185
L-alpha-Glycerophosphorylcholine	5.27325	not observed or confidently identified	8.2215	5.054	8.5385
L-Arginine	6.237	13.953	10.341	7.78925	12.358
L-Asparagine	5.6395	10.453	not observed or confidently identified	5.51	9.3845
L-Aspartate	6.27025	11.4607	8.8435	5.91375	9.64467
L-Carnosine	5.839	12.0193	9.48667	6.37075	9.399
L-Citrulline	5.4725	10.3667	8.604	5.57975	9.47833
L-Cystathionine	6.5525	12.1125	9.88075	not observed or confidently identified	10.4585
L-Cysteic acid	5.4725	10.385	7.08525	5.00075	9.92067
L-Cysteinylglycine	not observed or confidently identified	not observed or confidently identified	3.413	3.36	not observed or confidently identified
L-Cystine	not observed or confidently identified	12.3087	9.366	not observed or confidently identified	not observed or confidently identified
L-Dihydroorotic acid	4.442	8.498	3.5145	3.824	7.089
L-Glutamic acid	5.82175	11.0068	8.201	5.4305	9.518
L-Glutamine	not observed or confidently identified	10.0542	8.106	5.39425	9.067
L-Histidine	6.4025	14.683	9.039	not observed or confidently identified	9.999
L-Isoleucine	4.0095	7.63	5.7225	4.28425	6.702
L-Kynurenine	4.04325	7.181	5.78975	4.4065	6.5585
L-Leucine	4.0095	7.38367	5.7225	4.28425	6.64475
L-Lysine	5.174	13.8483	not observed or confidently identified	7.6895	not observed or confidently identified
L-Phenylalanine	4.01025	7.10133	5.623	4.26775	6.193
L-Pipecolic acid	4.375	8.31317	6.4255	4.47375	7.2465
L-Proline	4.409	8.689	6.78225	4.4215	7.55
L-Pyroglutamic acid	4.57525	8.72067	not observed or confidently identified	3.8835	6.59533
L-Ribulose	2.716	6.70867	not observed or confidently identified	not observed or confidently identified	not observed or confidently identified
L-Saccharopine	6.403	11.5853	9.8035	6.0685	9.95733
L-Threonine	5.2065	9.97433	7.713	not observed or confidently identified	8.9295
L-Tryptophan	1.484	not observed or confidently identified	not observed or confidently identified	not observed or confidently identified	not observed or confidently identified
L-Tyrosine	4.4765	8.85533	6.627	4.80975	7.89975
L-Valine	not observed or confidently identified	7.88933	not observed or confidently identified	not observed or confidently identified	not observed or confidently identified
Melatonin	1.17675	2.26283	2.048	1.7725	1.977
Melibiose	5.4415	9.97733	7.845	5.2665	9.75775
Metanephrine	3.246	7.191	5.438	4.607	8.196
Methylmalonic acid	3.312	7.30067	6.203	3.086	9.344
myo-Inositol	not observed or confidently identified	not observed or confidently identified	7.677	not observed or confidently identified	10.0785
N-(2-FUROYL)GLYCINE	3.22925	6.822	4.1135	2.85775	3.9985
N,N-Diacetylchitobiose	4.80875	9.08633	7.32533	4.71475	7.80225
N,N-Dimethylglycine	4.309	8.47467	6.356	4.166	7.072
Na-Acetyl-L-ornithine	5.17425	10.3133	8.70833	5.37075	9.06175
N-Acetyl-5-hydroxytryptamine	1.30975	2.78633	2.26475	1.95225	2.5405
N-Acetyl-D-glucosamine	3.8115	7.88233	5.535	3.782	not observed or confidently identified
N-Acetyl-glucosamine 1-phosphate	6.3515	11.6467	8.9525	5.8765	9.623
N-Acetylglucosamine 6-phosphate	6.436	11.6602	9.3845	not observed or confidently identified	9.78767
N-Acetyl-L-aspartate	not observed or confidently identified	not observed or confidently identified	7.785	not observed or confidently identified	not observed or confidently identified
N-Acetyl-L-glutamic acid	5.56375	10.9887	8.62475	4.87525	9.287
N-Acetylmuramic acid	not observed or confidently identified	9.23433	6.875	4.0385	not observed or confidently identified
N-Acetylneuraminic acid	5.539	10.2583	6.9865	4.98575	8.60367
N-Acetylputrescine	4.11	8.64733	6.895	5.3855	9.453
NADP+	not observed or confidently identified	12.3867	10.2283	8.409	10.7105
Nalpha-Acetyl-L-lysine	5.174	10.2517	8.70875	5.37	not observed or confidently identified
Ne-Acetyllysine	5.174	8.98817	7.5865	4.91375	not observed or confidently identified
N-FORMYLANTHRANILIC ACID	1.60875	not observed or confidently identified	2.1825	1.90225	2.069
N-Glycolylneuraminic acid	5.83825	10.7473	8.10775	5.3255	9.302
Nicotinamide	1.583	2.89133	2.40525	2.2355	2.86875
Nicotinamide hypoxanthine dinucleotide	6.188	not observed or confidently identified	8.82833	5.89675	9.15925
Nicotinic acid adenine dinucleotide	6.3375	11.188	9.11433	6.02925	9.875
O-Acetyl-L-carnitine	4.309	8.26833	6.5305	4.086	6.4035
Octanoic acid	1.1675	not observed or confidently identified	2.0045	1.677	not observed or confidently identified
Octanoyl-CoA	not observed or confidently identified	9.62867	not observed or confidently identified	not observed or confidently identified	6.8175
O-Phospho-L-serine	not observed or confidently identified	12.7607	9.666	not observed or confidently identified	10.581
O-Phosphorylethanolamine	not observed or confidently identified	13.2897	not observed or confidently identified	not observed or confidently identified	not observed or confidently identified
Orotic acid	3.8925	7.41867	2.2785	3.258	6.75
Orotidine 5-monophosphate	not observed or confidently identified	12.0823	9.0525	6.3655	10.8655
Oxalic acid	not observed or confidently identified	15.491	not observed or confidently identified	not observed or confidently identified	not observed or confidently identified
PA(6:0/6:0)	2.6965	5.372	3.5305	2.1715	2.575
Pantothenic acid	3.79425	7.56	5.14325	3.122	5.879
PC(3:0/3:0)	3.246	5.751	not observed or confidently identified	not observed or confidently identified	3.699
PE(6:0/6:0)	2.20675	5.39517	3.993	2.633	2.39075
Phenethylamine	2.414	5.53167	4.4855	4.4055	7.88
Phenylpyruvate	not observed or confidently identified	not observed or confidently identified	not observed or confidently identified	2.081	not observed or confidently identified
Phosphatidylinositol-3,4,5-triphosphate C-6	6.437	not observed or confidently identified	8.78425	not observed or confidently identified	not observed or confidently identified
Phosphatidylinositol-4,5-bisphosphate C-6	not observed or confidently identified	10.202	8.15575	8.66	7.89525
Phosphocholine	6.735	not observed or confidently identified	10.1565	not observed or confidently identified	9.486
Phosphocreatine	6.7695	12.1657	9.52333	6.4185	9.8925
Phosphoenolpyruvic acid	not observed or confidently identified	12.455	10.353	7.6475	10.8957
Propiolic acid	not observed or confidently identified	6.93133	not observed or confidently identified	not observed or confidently identified	not observed or confidently identified
PROPIONYL COENZYME A	6.038	10.7373	8.64175	7.734	8.0225
Prostaglandin D2	1.3005	not observed or confidently identified	2.2535	1.912	2.069
Prostaglandin E2	1.3005	not observed or confidently identified	2.2535	1.912	2.069
Prostaglandin I2	1.8505	not observed or confidently identified	3.3435	1.912	2.3265
PS(6:0/6:0)	3.48625	6.57383	4.562	3.18175	2.608
Putrescine	6.0365	not observed or confidently identified	12.102	11.743	18.0805
Pyridoxal	1.8	3.77083	2.6195	2.334	3.286
Pyridoxal 5-phosphate	not observed or confidently identified	9.94067	not observed or confidently identified	not observed or confidently identified	not observed or confidently identified
Pyridoxamine	4.076	10.6393	6.91175	6.0825	6.5335
Pyridoxamine-5-phosphate	not observed or confidently identified	14.1277	not observed or confidently identified	not observed or confidently identified	10.274
Pyridoxine	2.016	4.273	3.06625	2.45625	3.5595
Riboflavin	3.1795	5.342	3.7815	3.44375	5.213
Riboflavin 5-monophosphate	5.375	9.43533	7.78	5.9945	7.99225
S-(5-Adenosyl)-L-homocysteine	5.539	9.369	7.85475	5.596	8.37575
S-(5-Adenosyl)-L-methionine	6.968	12.4817	10.357	7.63	9.588
Serotonin	3.312	8.16833	5.957	5.413	10.5935
S-Lactoylglutathione	not observed or confidently identified	not observed or confidently identified	not observed or confidently identified	4.2625	5.439
Spaglumic acid	6.3445	12.2357	9.77925	5.77775	10.5738
Spermine	5.0065	9.14967	not observed or confidently identified	not observed or confidently identified	not observed or confidently identified
Sphingosine 1-phosphate	4.201	6.63383	6.07575	4.51075	5.40375
Stachyose	6.5025	11.9143	9.8385	6.403	10.68
Succinic acid	4.442	10.1307	not observed or confidently identified	not observed or confidently identified	9.812
Sucrose	5.573	9.97733	not observed or confidently identified	4.9815	9.23
Taurine	4.34275	9.5835	6.49	4.56375	8.94175
Thiamine	4.1765	7.70967	6.1215	5.0675	not observed or confidently identified
Thiamine monophosphate	6.6685	12.864	9.608	6.56	8.9775
Thiamine pyrophosphate	not observed or confidently identified	12.4317	11.085	not observed or confidently identified	9.847
Thymidine	1.78425	3.57117	2.67967	not observed or confidently identified	3.33825
Thymidine 5-triphosphate	not observed or confidently identified	12.1092	8.9925	11.049	10.3145
Thymidine monophosphate	5.6135	9.84267	7.981	5.22925	8.6535
Thymine	1.783	3.45	2.42733	2.348	3.283
trans-4-Hydroxy-L-proline	not observed or confidently identified	not observed or confidently identified	6.98275	4.70675	not observed or confidently identified
trans-beta-Hydromuconic acid	4.309	10.769	not observed or confidently identified	4.3975	not observed or confidently identified
Tyramine	3.112	7.62	5.3685	4.944	9.172
UDP-GlcNAc	6.238	11.411	8.06667	5.62025	9.923
UDP-Glucuronate	6.9035	12.445	8.483	6.1645	11.7985
Uracil	1.88425	not observed or confidently identified	not observed or confidently identified	2.52	4.38825
Urea	not observed or confidently identified	5.20233	not observed or confidently identified	2.807	not observed or confidently identified
Uric acid	not observed or confidently identified	8.87033	4.305	4.6275	not observed or confidently identified
Uridine	2.6485	5.84733	3.451	2.9615	5.73225
Uridine 5-diphosphate	7.4675	11.896	9.839	8.9795	10.5512
Uridine 5-diphosphoglucose	6.36975	11.6733	7.929	5.764	10.4197
Uridine 5-triphosphate	not observed or confidently identified	not observed or confidently identified	not observed or confidently identified	not observed or confidently identified	11.3895
Uridine monophosphate	6.2725	10.8787	8.543	6.0945	9.843
Xanthine	2.981	5.76933	3.684	3.60025	7.0695
Xanthosine	4.44225	8.48467	5.52875	4.123	7.799
Xanthurenic acid	6.09525	7.76267	not observed or confidently identified	3.63775	7.13675
XMP	7.1175	12.169	9.866	not observed or confidently identified	11.239
Xylitol	3.713	8.04233	5.257	3.7205	7.46575

## Sheet: Table S7
Column	Split	Replicate	# of features used	model used	SVR C value	SVR gamma value	Slope	Intercept	R squared
BEH Amide	1	1	123	SVR	10	0.1	0.8569	0.6313	0.8135
	1	2	38	SVR	10	0.1	0.8169	0.7166	0.794
	1	3	43	SVR	10	0.1	0.8254	0.6761	0.8175
	2	1	85	SVR	10	0.1	0.7909	0.9422	0.7268
	2	2	80	SVR	10	0.1	0.7925	0.9032	0.7213
	2	3	45	SVR	100	0.1	0.8044	0.8707	0.712
	3	1	18	Random Forest	N/A	N/A	0.6413	1.503	0.6734
	3	2	43	SVR	10	0.1	0.7063	1.3726	0.7414
	3	3	33	SVR	10	0.1	0.6959	1.402	0.7428
	4	1	35	SVR	10	0.1	0.8425	0.7884	0.8175
	4	2	110	SVR	10	0.1	0.8668	0.869	0.841
	4	3	135	SVR	10	0.1	0.8744	0.8214	0.8341
	5	1	151	SVR	10	0.1	0.8324	0.8458	0.8536
	5	2	56	SVR	10	0.1	0.8344	0.7944	0.8439
	5	3	91	SVR	10	0.1	0.8436	0.7764	0.8459
	Average	Average	72.4				0.80164	0.92754	0.785247
CHILIC	1	1	27	SVR	10	0.1	0.6718	3.1495	0.6654
	1	2	57	SVR	100	0.1	0.8298	1.5388	0.8044
	1	3	57	SVR	100	0.1	0.7755	1.967	0.7718
	2	1	7	Random Forest	N/A	N/A	0.983	0.0752	0.8045
	2	2	52	SVR	100	0.1	0.904	0.7601	0.8164
	2	3	52	SVR	100	0.1	0.9787	-0.0113	0.8232
	3	1	31	SVR	10	1	0.8001	1.9716	0.8009
	3	2	46	SVR	100	0.1	0.8152	1.9403	0.8118
	3	3	66	SVR	10	1	0.6916	3.0564	0.7545
	4	1	97	SVR	10	0.1	0.8585	1.2168	0.8088
	4	2	67	SVR	10	0.1	0.8506	1.3145	0.8019
	4	3	77	SVR	100	0.1	0.8485	1.2626	0.8173
	5	1	53	SVR	1000	0.01	0.7364	2.3614	0.7359
	5	2	73	SVR	10	0.1	0.7018	2.7144	0.6609
	5	3	108	SVR	10	0.1	0.7719	2.1199	0.7416
	Average	Average	58				0.814493	1.69581	0.77462
HILIC-Z	1	1	16	SVR	10	1	0.7863	1.3932	0.8614
	1	2	31	SVR	100	0.1	0.771	1.485	0.8364
	1	3	11	SVR	10	1	0.7485	1.7297	0.8274
	2	1	21	Random Forest	N/A	N/A	0.7535	1.9083	0.7853
	2	2	21	SVR	10	1	0.8169	1.4849	0.7904
	2	3	21	Random Forest	N/A	N/A	0.7585	1.8629	0.7956
	3	1	22	SVR	10	1	0.8955	0.7501	0.7544
	3	2	22	SVR	10	1	0.8957	0.7305	0.7537
	3	3	12	SVR	10	1	0.8414	1.0895	0.7427
	4	1	12	SVR	10	1	0.8916	0.6423	0.8694
	4	2	12	SVR	10	1	0.9002	0.5453	0.8668
	4	3	12	SVR	10	1	0.86	0.8629	0.8553
	5	1	19	SVR	100	0.1	0.8184	1.3683	0.8543
	5	2	34	SVR	100	0.1	0.8553	1.258	0.8701
	5	3	19	SVR	10	1	0.8932	0.8872	0.8645
	Average	Average	19				0.8324	1.19987	0.821847
iHILIC	1	1	61	SVR	10	0.1	0.8613	0.7522	0.8611
	1	2	256	SVR	10	0.1	0.8534	0.907	0.8015
	1	3	51	SVR	10	1	0.8367	0.9766	0.7954
	2	1	146	SVR	10	0.1	0.8353	0.7183	0.8718
	2	2	56	SVR	100	0.1	0.8762	0.607	0.8848
	2	3	11	SVR	10	1	0.8723	0.5639	0.8551
	3	1	12	Random Forest	N/A	N/A	0.77	1.0647	0.7308
	3	2	32	SVR	100	0.1	0.8346	0.5362	0.6683
	3	3	12	SVR	100	0.1	1.0248	0.0025	0.7781
	4	1	58	SVR	1000	0.01	0.838	0.5808	0.7101
	4	2	33	SVR	100	0.1	0.8627	0.4945	0.7836
	4	3	18	SVR	10	1	0.748	0.9906	0.7626
	5	1	25	SVR	100	0.1	0.7392	1.3541	0.7564
	5	2	80	SVR	10	0.1	0.7422	1.3515	0.7458
	5	3	45	SVR	10	0.1	0.7724	1.3614	0.691
	Average	Average	59.7333				0.83114	0.81742	0.77976
PHILIC	1	1	108	SVR	10	0.1	0.739412	2.08278	0.833233
	1	2	48	SVR	100	0.1	0.818361	1.55899	0.863449
	1	3	76	SVR	10	0.1	0.724687	2.29931	0.838108
	2	1	25	SVR	10	1	0.646783	3.0889	0.667654
	2	2	50	SVR	100	0.1	0.773364	1.70019	0.688235
	2	3	190	SVR	10	0.1	0.699011	2.39896	0.67123
	3	1	81	SVR	100	0.1	0.833743	1.37292	0.658851
	3	2	61	SVR	100	0.1	0.851066	1.18723	0.681478
	3	3	16	SVR	10	1	0.794731	1.67162	0.689904
	4	1	50	SVR	1000	0.01	0.716143	2.44979	0.849052
	4	2	35	SVR	100	0.1	0.707112	2.70246	0.86018
	4	3	20	SVR	10	1	0.669579	2.91446	0.796943
	5	1	42	SVR	100	0.1	0.840328	1.39567	0.789052
	5	2	32	SVR	100	0.1	0.818726	1.40245	0.74903
	5	3	47	SVR	100	0.1	0.832694	1.47514	0.799276
	Average	Average	58.7333				0.764383	1.98006	0.762378

## Sheet: Table S8
BEH Amide		CHILIC		HILIC-Z		iHILIC		PHILIC
Features	number of models used in	Features	number of models used in	Features	number of models used in	Features	number of models used in	Features	number of models used in
AATS1i	15	nAcid	15	nBase	15	nBase	15	AATS1i	15
ATSC1c	15	ETA_dEpsilon_D	15	BCUTZ-1h	15	GATS1dv	15	GATS1dv	15
ATSC1dv	15	SlogP_VSA3	15	Kier3	15	EState_VSA9	15	GATS1s	15
ATSC4s	15	AMID_C	15	EState_VSA9	15	SLogP	15	BCUTZ-1h	15
MATS1s	15	SLogP	15	SLogP	15	nAcid	14	ETA_dEpsilon_D	15
BCUTpe-1l	15	AATS0Z	14	AATS1i	14	ATSC1dv	14	Kier3	15
AETA_eta_B	15	AATS1i	14	AMID_C	14	GATS4dv	14	AMID_C	15
ETA_dEpsilon_D	15	ATSC1dv	14	nAcid	12	GATS1s	14	RotRatio	15
Kier3	15	GATS1dv	14	BCUTse-1h	12	ETA_dEpsilon_C	13	SLogP	15
EState_VSA9	15	GATS1d	14	AATS1p	11	AATS1i	12	nBase	14
AMID_C	15	GATS3d	14	SlogP_VSA3	11	MATS1s	12	AATSC1s	14
nRot	15	BCUTZ-1h	14	ATSC1c	10	AATS4s	11	Mse	14
SLogP	15	AETA_eta_B	14	BCUTZ-1l	10	AATSC0v	11	SssCH2	14
nBase	14	AMID_h	14	VSA_EState4	8	SlogP_VSA1	11	ETA_epsilon_1	14
AATS4s	14	TopoPSA(NO)	14	GATS1c	7	SlogP_VSA3	11	FilterItLogS	14
BCUTZ-1l	14	GATS2d	13	GATS1d	7	VSA_EState4	11	GATS1Z	13
SlogP_VSA3	14	VSA_EState4	13	AETA_eta_B	7	GATS3c	10	GATS2v	13
VSA_EState6	14	ATSC1c	12	RotRatio	7	GATS2v	10	VSA_EState4	13
AATS2i	13	AATSC4v	12	AATSC2c	6	AXp-1dv	10	AATS2s	11
AATSC2s	13	RotRatio	12	GATS1s	6	AMID_h	10	GATS1d	11
GATS1d	13	BCUTpe-1l	11	ETA_dEpsilon_D	6	AMID_N	10	SlogP_VSA3	11
GATS3d	13	AATS0v	11	GATS1Z	5	JGI2	10	VSA_EState8	11
BCUTdv-1l	13	ATSC1v	11	GATS1dv	4	ATSC3c	10	AMID_N	11
BCUTZ-1h	13	ATSC2v	11	BCUTpe-1l	4	AATS0Z	9	ATSC1dv	10
AMID_h	13	GATS1v	11	GATS4c	3	BCUTdv-1l	9	BCUTd-1l	10
nAcid	12	BCUTse-1h	11	GATS1p	3	BCUTpe-1l	9	ETA_epsilon_5	10
ATSC6v	12	IC1	11	Mi	3	nRot	9	ETA_dEpsilon_C	10
GATS1s	12	FilterItLogS	11	AETA_eta_F	3	ATSC1c	8	EState_VSA9	10
BCUTc-1h	12	ATSC6v	11	ATSC6v	3	ATSC2c	8	AATSC1c	9
BCUTse-1h	12	GATS3c	11	MATS1s	3	ATSC6c	8	AATSC0v	9
VSA_EState4	12	EState_VSA9	11	GATS2p	3	AATSC1c	8	AATSC3i	9
TopoPSA(NO)	12	nRot	11	VSA_EState6	3	GATS4c	8	MATS1s	9
JGT10	12	AATSC2Z	10	ATSC2c	2	GATS1Z	8	ETA_epsilon_2	9
ATSC2v	11	GATS2p	10	ETA_epsilon_5	2	GATS4Z	8	AATSC4s	8
GATS2d	11	nBase	10	AMID_h	2	PEOE_VSA1	8	MIC0	8
AATS1p	10	AATS0i	10	ATSC6p	2	ATSC2d	8	AATS0i	8
AATSC1s	10	AXp-1dv	10	AATS0p	2	VSA_EState9	8	AATS4s	7
SM1_DzZ	10	AATSC3d	9	ATSC3dv	2	AATS2s	7	AATSC0dv	7
Mi	10	ATSC3dv	9	BCUTse-1l	2	BCUTZ-1h	7	AATSC5v	7
FilterItLogS	10	ATSC6p	9	AATSC1d	1	ETA_epsilon_5	7	BCUTpe-1l	7
PEOE_VSA1	10	GATS1s	9	GATS3Z	1	AATS2i	6	AXp-1dv	7
AATS0Z	9	JGT10	9	ETA_psi_1	1	ATSC7v	6	AETA_eta_F	7
AATS0i	9	VSA_EState7	9	AMID_O	1	AATSC0d	6	PEOE_VSA6	7
GATS1c	9	ETA_dBeta	9	nRot	1	BCUTv-1l	6	VSA_EState5	7
GATS4c	9	AATSC1dv	8	Mv	1	ETA_epsilon_1	6	AATSC5i	7
RotRatio	9	GATS1Z	8	GATS5c	1	TopoPSA(NO)	6	AATS5Z	6
AATS2s	8	AMID_O	8	AATS5Z	1	ATSC5c	6	ATSC6v	6
ATSC6i	8	AATS3i	8	BCUTi-1h	1	MIC0	6	AATSC3d	6
GATS3Z	8	GATS1p	8	FilterItLogS	1	ATSC1s	6	GATS4dv	6
BCUTd-1l	8	BCUTZ-1l	8	VSA_EState8	1	AATSC0dv	5	GATS3i	6
AETA_eta_RL	8	BCUTse-1l	8			AATSC4dv	5	BCUTse-1h	6
AATS5Z	8	VSA_EState6	8			Mse	5	EState_VSA3	6
AATSC0d	8	ATSC2p	8			ETA_dEpsilon_D	5	VSA_EState7	6
Xc-3d	8	IC0	7			ATSC3Z	5	AMID_h	6
ATSC2d	7	MIC0	7			ATSC6Z	5	JGI2	6
ATSC3Z	7	JGI5	7			ATSC5i	5	AATS0Z	6
ATSC2p	7	MATS1s	6			AATSC4s	5	AATS0v	6
GATS3c	7	ETA_dEpsilon_C	6			GATS3Z	5	BCUTv-1l	6
GATS1dv	7	AATS4p	6			MID_N	5	nAcid	5
GATS4p	7	AATSC1c	6			RotRatio	5	AATS0dv	5
AATS3dv	7	AETA_eta_RL	6			ATSC5dv	4	AATS3i	5
AATS5se	6	VSA_EState8	6			ATSC6p	4	ATSC1c	5
AATSC4v	6	Mi	6			ATSC7i	4	ATSC6i	5
GATS2c	6	AATS1Z	6			GATS2c	4	AATSC0d	5
GATS4dv	6	GATS2Z	6			GATS3p	4	GATS1c	5
GATS5d	6	AATS0p	5			AMID_C	4	GATS2s	5
GATS4s	6	ATSC3d	5			AATS0i	4	Mi	5
BCUTse-1l	6	ATSC7i	5			ATSC4c	4	AETA_eta_RL	5
BCUTi-1h	6	AMID_N	5			ATSC2p	4	GATS3c	5
ETA_shape_p	6	AATSC4c	5			GATS2dv	4	MATS5Z	5
AETA_eta_F	6	AATSC3dv	5			GATS4s	4	AATS5i	4
ATSC3c	6	BCUTd-1l	5			GATS3v	4	ATSC6dv	4
ATSC3d	6	GATS2c	5			CIC3	4	ATSC6p	4
AATSC1dv	6	BCUTdv-1l	5			VSA_EState6	4	AATSC4dv	4
AATS3i	5	SaasC	4			SdsssP	4	AATSC1d	4
ATSC7s	5	AATSC3i	4			AATSC0p	4	GATS5c	4
AATSC1c	5	AATS2s	4			AATS0v	3	GATS2Z	4
AATSC2c	5	GATS4s	4			AATSC1s	3	AETA_beta_ns_d	4
AATSC3c	5	AATS1p	4			GATS1c	3	nRot	4
AATSC3d	5	BCUTc-1h	4			SIC0	3	ATSC5dv	3
AATSC1Z	5	ATSC3v	4			Kier3	3	ATSC3d	3
AATSC5Z	5	AATSC1s	4			ATSC3s	3	ATSC1v	3
AATSC5v	5	AATSC4s	4			ATSC4Z	3	ATSC5i	3
AATSC3i	5	ETA_epsilon_5	4			ATSC7Z	3	AATSC5c	3
AATSC0dv	5	Kier3	3			ATSC6v	3	AATSC5Z	3
BCUTc-1l	5	AATS2p	3			ATSC7p	3	GATS1p	3
ATSC7d	4	GATS3i	3			AATSC3c	3	AETA_eta_L	3
ATSC6p	4	ETA_dEpsilon_B	3			AATSC1i	3	IC0	3
ATSC2i	4	SMR_VSA7	3			GATS3d	3	JGI3	3
ATSC4i	4	AATS4dv	3			GATS1p	3	JGT10	3
AATSC0c	4	ATSC6c	3			BCUTc-1h	3	ATSC4dv	3
AATSC4s	4	ATSC6i	3			SM1_DzZ	3	AATSC0c	3
AATSC1se	4	GATS2v	3			Xc-3d	3	AATSC2c	3
MATS1c	4	BCUTd-1h	3			Mi	3	GATS4s	3
GATS2s	4	MID_N	3			ETA_dAlpha_B	3	PEOE_VSA8	3
GATS1p	4	JGI3	3			nHBDon	3	SlogP_VSA5	3
AXp-1dv	4	GATS1c	3			SlogP_VSA5	3	VSA_EState2	3
SIC3	4	GATS2s	3			JGI4	3	AMW	3
CIC3	4	SM1_DzZ	3			JGT10	3	AATSC1se	3
SlogP_VSA1	4	AATS5Z	2			AATSC1se	3	AATS1Z	2
JGI5	4	ATSC1d	2			AATSC4p	2	AATS3p	2
ATSC5c	4	GATS5dv	2			C1SP2	2	ATSC3s	2
ATSC3v	4	GATS4v	2			AETA_alpha	2	ATSC3v	2
AATSC4c	4	AATSC1se	2			AATS0dv	2	ATSC7p	2
GATS4d	4	MATS3p	2			AATS1dv	2	AATSC5s	2
BCUTi-1l	4	GATS1se	2			AATS3s	2	AATSC3v	2
BalabanJ	4	PEOE_VSA1	2			AATS0p	2	AATSC4i	2
AETA_beta_s	4	AATS0d	2			AATS1p	2	GATS5dv	2
MIC0	4	GATS4dv	2			AATS4p	2	GATS2d	2
ATSC2c	3	GATS4d	2			ATSC7c	2	GATS3d	2
ATSC4c	3	GATS2se	2			ATSC8c	2	GATS3s	2
ATSC1v	3	SIC1	2			ATSC2dv	2	GATS3Z	2
AATSC5dv	3	JGI4	2			ATSC3dv	2	GATS1v	2
GATS5c	3	nAromAtom	2			ATSC4dv	2	GATS5v	2
GATS5dv	3	BCUTs-1l	2			ATSC6dv	2	GATS2p	2
GATS3se	3	ATSC4c	2			ATSC7d	2	BCUTc-1h	2
ETA_dEpsilon_C	3	ATSC2dv	2			ATSC5s	2	BCUTse-1l	2
SMR_VSA7	3	ATSC3Z	2			ATSC6s	2	AETA_alpha	2
MID_N	3	ATSC5i	2			ATSC7s	2	CIC3	2
AATS5dv	3	RPCG	2			ATSC8s	2	PEOE_VSA7	2
AATSC1d	3	AATSC4dv	1			ATSC2Z	2	JGI7	2
AATSC4i	3	AATSC0c	1			ATSC2v	2	AATS1dv	2
AMID_N	3	ATSC2d	1			ATSC3v	2	BCUTc-1l	2
BCUTs-1l	3	AATSC2s	1			ATSC5v	2	ATSC5v	2
ETA_epsilon_5	3	AATSC1p	1			ATSC1p	2	NsCH3	2
MATS1se	3	MATS4Z	1			ATSC5p	2	AETA_eta_B	2
GATS3i	3	MATS4p	1			ATSC1i	2	ATSC2d	2
JGI3	3	AETA_beta_ns_d	1			ATSC2i	2	ATSC7Z	2
GATS3s	3	AATSC2d	1			ATSC6i	2	ATSC2v	2
AATS4i	3	AATSC1v	1			AATSC2c	2	GATS2dv	2
ATSC7c	2	n6aRing	1			AATSC4c	2	GATS5Z	2
ATSC5v	2	AATSC4i	1			AATSC2dv	2	AXp-1d	2
AATSC3s	2	nBondsA	1			AATSC3dv	2	MZ	2
AATSC0v	2	AATS1dv	1			AATSC2s	2	Mv	2
AATSC2i	2	AATS2i	1			AATSC2Z	2	SaasC	2
nHBDon	2	ATSC4dv	1			AATSC2i	2	AETA_beta	2
AATSC4p	2	ATSC8s	1			AATSC3i	2	PEOE_VSA2	2
ATSC6c	2	ATSC4v	1			AATSC4i	2	ATSC6Z	2
AATSC5d	2	ATSC1p	1			MATS3p	2	ATSC8se	2
GATS1Z	2	ATSC2i	1			GATS3dv	2	SdssC	2
GATS2se	2	ATSC4i	1			GATS2d	2	IC1	2
BertzCT	2	AATSC2c	1			GATS3s	2	ATSC4Z	1
PEOE_VSA8	2	AATSC2dv	1			GATS2Z	2	BCUTZ-1l	1
JGI4	2	AATSC0d	1			GATS1v	2	RPCG	1
WPol	2	AATSC2i	1			GATS2p	2	MIC1	1
SpMAD_A	2	GATS3Z	1			GATS4p	2	EState_VSA4	1
AATS5s	2	BCUTv-1l	1			BCUTc-1l	2	SpMax_A	1
AATS0p	2	AETA_alpha	1			BCUTd-1l	2	SpMAD_A	1
ATSC3s	2	JGI1	1			BCUTZ-1l	2	AATS3dv	1
ATSC1p	2					BCUTse-1h	2	AATS5dv	1
ATSC7i	2					BCUTse-1l	2	AATS5s	1
AATSC2p	2					BCUTi-1h	2	AATS1p	1
AATSC5i	2					BalabanJ	2	ATSC3c	1
GATS2v	2					AXp-1d	2	ATSC4c	1
AATS0dv	1					AXp-0dv	2	ATSC6c	1
ATSC3dv	1					SssCH2	2	ATSC8dv	1
ATSC7v	1					SsssCH	2	ATSC8d	1
ATSC3p	1					SdssC	2	ATSC5s	1
AATSC4Z	1					ETA_shape_y	2	ATSC7s	1
AATSC0p	1					ETA_shape_x	2	ATSC3Z	1
GATS2dv	1					AETA_beta_s	2	ATSC5Z	1
GATS2Z	1					AETA_eta_L	2	ATSC4v	1
AETA_beta	1					ETA_dBeta	2	ATSC2p	1
ETA_beta_ns	1					IC0	2	ATSC3p	1
ETA_epsilon_2	1					IC2	2	ATSC8p	1
ETA_dBeta	1					SIC3	2	ATSC7i	1
IC0	1					SMR_VSA4	2	AATSC3dv	1
EState_VSA2	1					EState_VSA4	2	AATSC2d	1
EState_VSA5	1					AMID_O	2	AATSC2s	1
VSA_EState7	1					SpMAD_A	1	AATSC3s	1
AATS1Z	1					nN	1	AATSC1Z	1
ATSC4p	1					AATS3dv	1	AATSC2Z	1
AXp-0d	1					AATS0d	1	AATSC4v	1
AATSC0i	1					AATS0s	1	AATSC3p	1
GATS4Z	1					AATS1s	1	AATSC0i	1
VSA_EState1	1					AATS1Z	1	AATSC1i	1
AATS5i	1					AATS3i	1	MATS3Z	1
ATSC5d	1					AATS4i	1	MATS4Z	1
ATSC7Z	1					ATSC7dv	1	MATS3p	1
ATSC5i	1					ATSC8dv	1	MATS4p	1
AATSC2d	1					ATSC1d	1	GATS2c	1
ETA_epsilon_1	1					ATSC3d	1	GATS4c	1
fMF	1					ATSC4d	1	GATS4d	1
PEOE_VSA11	1					ATSC5d	1	GATS4Z	1
AMID	1					ATSC6d	1	GATS3v	1
AMID_O	1					ATSC5Z	1	GATS2se	1
GGI1	1					ATSC8Z	1	GATS3se	1
ATSC8dv	1					ATSC1v	1	GATS4p	1
ATSC1d	1					ATSC4v	1	GATS5p	1
ATSC6d	1					ATSC8v	1	GATS5i	1
ATSC8s	1					ATSC7se	1	BCUTdv-1h	1
ATSC5Z	1					ATSC8se	1	BCUTdv-1l	1
ATSC5se	1					ATSC3p	1	BCUTs-1h	1
ATSC7p	1					ATSC4p	1	BCUTs-1l	1
ATSC1i	1					ATSC3i	1	SM1_DzZ	1
ATSC8i	1					ATSC4i	1	BertzCT	1
AATSC2dv	1					AATSC1d	1	ETA_shape_p	1
AATSC3Z	1					AATSC2d	1	AETA_beta_s	1
AATSC5p	1					AATSC3d	1	ETA_psi_1	1
MATS4Z	1					AATSC4d	1	SIC3	1
GATS3v	1					AATSC3s	1	CIC1	1
RNCG	1					AATSC1Z	1	EState_VSA2	1
Mv	1					AATSC3Z	1	AMID_O	1
SdsssP	1					AATSC1v	1	JGI1	1
AETA_beta_ns_d	1					AATSC2v	1	JGI4	1
SIC0	1					AATSC3v	1	JGI5	1
VSA_EState5	1					AATSC4v	1	JGI6	1
						AATSC2p	1	ATSC3dv	1
						AATSC3p	1	AATSC5p	1
						AATSC0i	1	SMR_VSA4	1
						MATS4Z	1	ATSC7d	1
						MATS4p	1
						GATS4d	1
						GATS2s	1
						GATS4v	1
						GATS3se	1
						GATS3i	1
						BCUTdv-1h	1
						BCUTs-1l	1
						BCUTi-1l	1
						SM1_Dzv	1
						BertzCT	1
						RNCG	1
						RPCG	1
						Xc-4d	1
						Xc-5dv	1
						MZ	1
						Mv	1
						NsNH2	1
						ETA_shape_p	1
						AETA_beta	1
						AETA_beta_ns_d	1
						AETA_eta	1
						AETA_eta_RL	1
						AETA_eta_F	1
						AETA_eta_B	1
						ETA_epsilon_2	1
						ETA_psi_1	1
						fMF	1
						IC1	1
						SIC1	1
						CIC0	1
						CIC1	1
						MIC1	1
						ZMIC1	1
						FilterItLogS	1
						PEOE_VSA2	1
						PEOE_VSA3	1
						PEOE_VSA6	1
						PEOE_VSA8	1
						PEOE_VSA9	1
						EState_VSA2	1
						VSA_EState2	1
						VSA_EState3	1
						VSA_EState5	1
						VSA_EState7	1
						VSA_EState8	1
						AMID	1
						JGI3	1
						JGI5	1
						TopoShapeIndex	1
						AATSC1p	1
						GATS2se	1
						NsOH	1
						TIC0	1
						AMW	1
						ATSC2s	1

## Sheet: Table S9
BEH Amide
Limited Feature Selection										Unrestricted Feature Selection
	number of features	slope	intercept	r2	average error	median error	absolute value of average error	absolute value of median error				number of features	slope	intercept	r2	average error	median error	absolute value of average error	absolute value of median error
Split 1	6	0.6847	1.3229	0.6137	-0.00159142	0.0260574	0.813468	0.675195		split 1	rep 1	123	0.8569	0.6313	0.8135	0.0303098	-0.0532902	0.514577	0.311321
	9	0.6653	1.3538	0.5437	-0.0521482	-0.0227034	0.890274	0.634723			rep 2	38	0.8169	0.7166	0.794	-0.0523787	-0.00336308	0.573634	0.445839
	12	0.7838	0.7685	0.7137	-0.139524	-0.151122	0.649245	0.424386			rep 3	43	0.8254	0.6761	0.8175	-0.0571052	-0.106061	0.547855	0.435256
Split 2	6	0.6966	1.3381	0.5767	-0.124957	-0.046754	0.747433	0.487505		split 2	rep 1	85	0.7909	0.9422	0.7268	-0.0662945	-0.00700563	0.559281	0.342343
	9	0.7294	1.0037	0.5853	-0.301511	-0.258662	0.888604	0.759553			rep 2	80	0.7925	0.9032	0.7213	-0.0975112	-0.0622213	0.566811	0.306105
	12	0.7783	0.8666	0.6056	-0.202845	-0.117511	0.755404	0.519161			rep 3	45	0.8044	0.8707	0.712	-0.0725987	-0.00625681	0.602042	0.348084
Split 3	6	0.584	1.8707	0.5514	0.0543285	-0.108292	0.91958	0.676287		split 3	rep 1	18	0.6413	1.503	0.6734	-0.0635091	-0.0838892	0.787641	0.587416
	9	0.6083	1.6783	0.6198	-0.0322852	-0.128494	0.843372	0.778034			rep 2	43	0.7063	1.3726	0.7414	0.0903084	0.0494159	0.617428	0.401789
	12	0.6912	1.4616	0.7119	0.112997	0.0116694	0.683522	0.474188			rep 3	33	0.6959	1.402	0.7428	0.073891	-0.00039806	0.62511	0.425176
Split 4	6	0.6814	1.5892	0.6819	0.0823594	0.074787	0.697219	0.512967		split 4	rep 1	35	0.8425	0.7884	0.8175	0.0435072	0.0616535	0.551064	0.443818
	9	0.7102	1.4773	0.7507	0.106583	0.0630286	0.640665	0.512619			rep 2	110	0.8668	0.869	0.841	0.238959	0.0743218	0.476614	0.360559
	12	0.8377	0.9133	0.8462	0.145461	0.0186536	0.488582	0.36536			rep 3	135	0.8744	0.8214	0.8341	0.227081	0.0643202	0.491073	0.36107
Split 5	6	0.5213	2.4704	0.5348	0.375153	0.148272	0.920833	0.625601		split 5	rep 1	151	0.8324	0.8458	0.8536	0.1121	0.000218645	0.489412	0.347766
	9	0.6318	1.8767	0.684	0.265054	0.158038	0.807864	0.674434			rep 2	56	0.8344	0.7944	0.8439	0.0697656	0.0673828	0.518374	0.436732
	12	0.7067	1.4668	0.7446	0.183125	0.120875	0.69728	0.483276			rep 3	91	0.8436	0.7764	0.8459	0.0918624	0.0805903	0.513418	0.387118
CHILIC
Limited Feature Selection										Unrestricted Feature Selection
	number of features	slope	intercept	r2	average error	median error	absolute value of average error	absolute value of median error				number of features	slope	intercept	r2	average error	median error	absolute value of average error	absolute value of median error
Split 1	6	0.5951	3.7933	0.5257	-0.00791613	0.137115	1.35596	0.783913		split 1	rep 1	27	0.6718	3.1495	0.6654	0.068347	0.230229	1.10336	0.688385
	9	0.7187	2.5206	0.6311	-0.12017	0.111038	1.13927	0.59606			rep 2	57	0.8298	1.5388	0.8044	-0.0590114	0.0792738	0.890368	0.634872
	12	0.7328	2.3611	0.751	-0.147146	-0.0697333	0.90435	0.481623			rep 3	57	0.7755	1.967	0.7718	-0.140225	0.053653	0.928672	0.678094
Split 2	6	0.8036	1.657	0.6843	-0.265088	-0.148695	1.0136	0.626254		split 2	rep 1	7	0.983	0.0752	0.8045	-0.090927	0.0347943	0.807015	0.472225
	9	0.8229	1.4697	0.7525	-0.26332	-0.175998	0.903483	0.536613			rep 2	52	0.904	0.7601	0.8164	-0.179406	-0.0792437	0.76036	0.494391
	12	0.8415	1.3377	0.7757	-0.212896	0.0122122	0.798897	0.504401			rep 3	52	0.9787	-0.0113	0.8232	-0.219567	-0.0679189	0.791219	0.512122
Split 3	6	0.5949	4.246	0.7371	0.536616	0.270555	1.07726	0.60164		split 3	rep 1	31	0.8001	1.9716	0.8009	0.141089	-0.014657	0.836598	0.481323
	9	0.6281	3.9877	0.7847	0.582848	0.371584	1.06615	0.658113			rep 2	46	0.8152	1.9403	0.8118	0.248286	0.217205	0.861616	0.663071
	12	0.7562	2.6091	0.8327	0.377015	0.213845	0.850962	0.495295			rep 3	66	0.6916	3.0564	0.7545	0.233008	0.174735	0.962087	0.631574
Split 4	6	0.4796	5.0966	0.5499	0.119533	-0.0737425	1.35448	0.844456		split 4	rep 1	97	0.8585	1.2168	0.8088	-0.136434	-0.0790596	0.85074	0.531845
	9	0.6247	3.2842	0.6077	-0.305637	-0.119102	1.16126	0.68567			rep 2	67	0.8506	1.3145	0.8019	-0.114772	-0.0221695	0.870907	0.633512
	12	0.7054	2.4318	0.6272	-0.386053	-0.0925224	1.22656	0.794341			rep 3	77	0.8485	1.2626	0.8173	-0.186875	-0.0821812	0.852051	0.505566
Split 5	6	0.5857	4.0575	0.6558	0.185964	0.00100024	1.2489	0.933709		split 5	rep 1	53	0.7364	2.3614	0.7359	-0.101616	0.110927	0.993763	0.597539
	9	0.7852	1.7935	0.6749	-0.214117	-0.0675383	1.21145	0.945036			rep 2	73	0.7018	2.7144	0.6609	-0.0722934	0.110058	1.1279	0.75436
	12	0.7366	2.4215	0.7439	-0.039828	0.0758677	1.00049	0.645892			rep 3	108	0.7719	2.1199	0.7416	-0.0117025	0.0485861	1.00724	0.649958
HILIC-Z
Limited Feature Selection										Unrestricted Feature Selection
	number of features	slope	intercept	r2	average error	median error	absolute value of average error	absolute value of median error				number of features	slope	intercept	r2	average error	median error	absolute value of average error	absolute value of median error
Split 1	6	0.7073	2.0867	0.7751	0.0699528	-0.00862442	0.920472	0.73406		split 1	rep 1	16	0.7863	1.3932	0.8614	-0.0791228	-0.110982	0.747986	0.59983
	9	0.8081	1.3002	0.8062	-0.0222207	0.00740754	0.867227	0.808936			rep 2	31	0.771	1.485	0.8364	-0.0932406	-0.0867196	0.770857	0.489538
	12	0.7512	1.6984	0.8289	-0.0156368	-0.12263	0.862468	0.771526			rep 3	11	0.7485	1.7297	0.8274	-0.002811	-0.0586102	0.866725	0.73603
Split 2	6	0.7787	1.7163	0.7673	0.248336	0.259105	0.890228	0.586566		split 2	rep 1	21	0.7535	1.9083	0.7853	0.272863	0.176056	0.841563	0.537043
	9	0.7775	1.7188	0.7751	0.242502	0.269156	0.882607	0.736122			rep 2	21	0.8169	1.4849	0.7904	0.26993	0.224028	0.859985	0.591176
	12	0.7795	1.6847	0.7829	0.22231	0.194196	0.85297	0.67358			rep 3	21	0.7585	1.8629	0.7956	0.260739	0.21397	0.821407	0.560614
Split 3	6	0.7677	1.7374	0.7008	0.064706	0.127299	0.838951	0.582963		split 3	rep 1	22	0.8955	0.7501	0.7544	-0.00252363	-0.151759	0.78067	0.50432
	9	0.7605	1.7325	0.7126	0.00843753	-0.0604451	0.843483	0.573825			rep 2	22	0.8957	0.7305	0.7537	-0.0202711	-0.147972	0.787416	0.518161
	12	0.8721	0.9175	0.6878	-0.00322264	-0.0389468	0.991522	0.812682			rep 3	12	0.8414	1.0895	0.7427	-0.0525778	-0.127409	0.821789	0.591601
Split 4	6	0.8212	1.2842	0.7884	0.0238033	0.0668515	0.900605	0.669804		split 4	rep 1	12	0.8916	0.6423	0.8694	-0.121919	-0.241896	0.759178	0.624688
	9	0.8186	1.1625	0.8255	-0.116343	-0.100338	0.811193	0.64074			rep 2	12	0.9002	0.5453	0.8668	-0.158519	-0.317639	0.776628	0.584311
	12	0.9464	0.2901	0.8859	-0.0877028	-0.291932	0.728472	0.56359			rep 3	12	0.86	0.8629	0.8553	-0.123889	-0.230344	0.800233	0.638163
Split 5	6	0.8008	1.4598	0.8182	0.0911015	0.0605275	0.773859	0.518025		split 5	rep 1	19	0.8184	1.3683	0.8543	0.12059	0.056127	0.691265	0.456047
	9	0.835	1.1561	0.8576	0.0224813	0.0138231	0.674665	0.48838			rep 2	34	0.8553	1.258	0.8701	0.264002	0.0980134	0.67609	0.481918
	12	0.8807	0.9575	0.8603	0.137615	0.0986369	0.655157	0.330746			rep 3	19	0.8932	0.8872	0.8645	0.153777	0.137874	0.65041	0.478804
iHILIC
Limited Feature Selection										Unrestricted Feature Selection
	number of features	slope	intercept	r2	average error	median error	absolute value of average error	absolute value of median error				number of features	slope	intercept	r2	average error	median error	absolute value of average error	absolute value of median error
Split 1	6	0.8977	0.6603	0.7669	0.189682	0.14459	0.776613	0.468742		split 1	rep 1	61	0.8613	0.7522	0.8611	0.0971621	0.0936194	0.622791	0.454275
	9	0.8975	0.6408	0.8144	0.159802	0.0159989	0.693928	0.441462			rep 2	256	0.8534	0.907	0.8015	0.214668	0.192326	0.751525	0.570052
	12	0.9866	0.2734	0.8226	0.210403	0.0976076	0.717343	0.485708			rep 3	51	0.8367	0.9766	0.7954	0.205288	0.157416	0.746172	0.605004
Split 2	6	0.9581	0.2083	0.8575	-0.00517815	-0.0692568	0.593409	0.336811		split 2	rep 1	146	0.8353	0.7183	0.8718	-0.120006	-0.0928033	0.619787	0.529117
	9	0.7896	1.0111	0.6767	-0.0597891	0.00939064	0.830691	0.399994			rep 2	56	0.8762	0.607	0.8848	-0.0231156	0.0704695	0.595758	0.460082
	12	0.8274	0.8184	0.8436	-0.0601743	0.0631254	0.660787	0.534591			rep 3	11	0.8723	0.5639	0.8551	-0.0859839	-0.00134933	0.613852	0.350141
Split 3	6	0.7459	1.0829	0.5133	-0.165687	-0.169527	1.07803	0.795374		split 3	rep 1	12	0.77	1.0647	0.7308	-0.0655172	-0.0258509	0.760942	0.613337
	9	0.7587	1.18	0.7017	-0.00560338	0.0911998	0.794354	0.575055			rep 2	32	0.8346	0.5362	0.6683	-0.276804	-0.0497004	0.849584	0.589531
	12	1.077	0.2254	0.7754	0.153087	-0.0449207	0.855534	0.622934			rep 3	12	1.0248	0.0025	0.7781	0.0966322	0.0030115	0.818494	0.67749
Split 4	6	0.6234	1.6622	0.622	-0.11015	0.0811268	0.896842	0.645277		split 4	rep 1	58	0.838	0.5808	0.7101	-0.181719	-0.0809203	0.864618	0.616511
	9	0.6379	1.5649	0.6142	-0.139105	2.84165e-05	0.885903	0.620709			rep 2	33	0.8627	0.4945	0.7836	-0.151602	-0.0110052	0.737258	0.563059
	12	0.6724	1.4135	0.6481	-0.128353	0.022814	0.811142	0.57774			rep 3	18	0.748	0.9906	0.7626	-0.19506	-0.105643	0.724759	0.442113
Split 5	6	0.5863	1.9166	0.5265	-0.152611	-0.0346465	1.03692	0.775651		split 5	rep 1	25	0.7392	1.3541	0.7564	0.0496073	0.0984749	0.74121	0.50074
	9	0.797	0.886	0.7833	-0.129564	-0.0360864	0.694889	0.550216			rep 2	80	0.7422	1.3515	0.7458	0.0618323	0.136932	0.77722	0.642576
	12	0.7706	0.9969	0.8153	-0.150387	-0.041739	0.636974	0.417272			rep 3	45	0.7724	1.3614	0.691	-0.00212874	-0.0465724	0.82851	0.661229
PHILIC
Limited Feature Selection										Unrestricted Feature Selection
	number of features	slope	intercept	r2	average error	median error	absolute value of average error	absolute value of median error				number of features	slope	intercept	r2	average error	median error	absolute value of average error	absolute value of median error
Split 1	6	0.6005	3.5078	0.6384	0.172287	0.124321	1.1986	0.703416		split 1	rep 1	108	0.7394	2.0828	0.8332	-0.0926896	-0.105615	0.829295	0.520763
	9	0.6914	2.5459	0.6738	-0.0301283	0.0559276	1.19969	0.786363			rep 2	48	0.8184	1.559	0.8634	0.0426077	-0.042295	0.73142	0.449753
	12	0.7429	2.057	0.7292	-0.0893088	0.0695169	0.97563	0.49107			rep 3	76	0.7247	2.2993	0.8381	0.000906423	-0.0154572	0.807814	0.503065
Split 2	6	0.6511	3.0631	0.5557	0.250229	0.104263	1.23995	0.733274		split 2	rep 1	25	0.6468	3.0889	0.6677	0.241067	0.0799837	1.10569	0.776855
	9	0.5887	3.4657	0.5431	0.149852	-0.052905	1.27922	0.817301			rep 2	50	0.7734	1.7002	0.6882	-0.12708	-0.0620973	1.08564	0.672713
	12	0.6403	3.0348	0.564	0.134503	0.070416	1.26618	0.85942			rep 3	190	0.699	2.399	0.6712	-0.0277786	0.0391686	1.02268	0.51449
Split 3	6	0.6264	3.1962	0.7429	0.00399937	-0.199929	0.859081	0.61199		split 3	rep 1	81	0.8337	1.3729	0.6589	-0.0475618	-0.0510019	0.911192	0.447254
	9	0.6069	3.4939	0.7424	0.135379	-0.0955693	0.860763	0.627027			rep 2	61	0.8511	1.1872	0.6815	-0.0852489	-0.124437	0.897053	0.504099
	12	0.6141	3.3682	0.6041	0.0713524	-0.108905	0.944895	0.507666			rep 3	16	0.7947	1.6716	0.6899	-0.082174	-0.130554	0.920735	0.554102
Split 4	6	0.5707	4.0458	0.6826	0.803153	0.662586	1.43398	0.869378		split 4	rep 1	50	0.7161	2.4498	0.8491	0.305595	0.108116	0.910011	0.562385
	9	0.535	4.2885	0.7754	0.776022	0.434065	1.35071	0.861471			rep 2	35	0.7071	2.7025	0.8602	0.490044	0.303884	0.933374	0.540479
	12	0.6452	3.274	0.7948	0.594054	0.245996	1.14085	0.674143			rep 3	20	0.6696	2.9145	0.7969	0.418527	0.0888172	1.02231	0.572729
Split 5	6	0.7073	2.1974	0.6106	-0.285838	-0.213263	1.26436	0.912105		split 5	rep 1	42	0.8403	1.3957	0.7891	0.0408881	-0.117566	0.844733	0.519995
	9	0.8793	0.7849	0.7692	-0.238548	-0.21582	0.908446	0.609816			rep 2	32	0.8187	1.4024	0.749	-0.135627	-0.306579	0.986061	0.754875
	12	0.7448	2.0778	0.7243	-0.0872369	-0.0534572	1.04706	0.794665			rep 3	47	0.8327	1.4751	0.7993	0.0555861	-0.132982	0.819274	0.518319
